# Supplementary material for: CD44 is a potential immunotherapeutic target and affects macrophage infiltration leading to poor prognosis
Source: PubMed Central journal article supplement (PMC10267145; doi:10.1038/s41598-023-33915-4), 2023-06-14

Fig S1 (A) Tissue RNA expression of CTLA-4 in the Human Protein Atlas website. (B) Tissue tissue specific cell types of CTLA-4 in the Human Protein Atlas website.

A

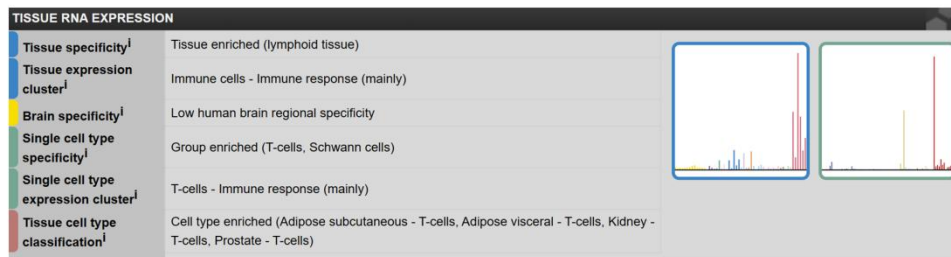

B

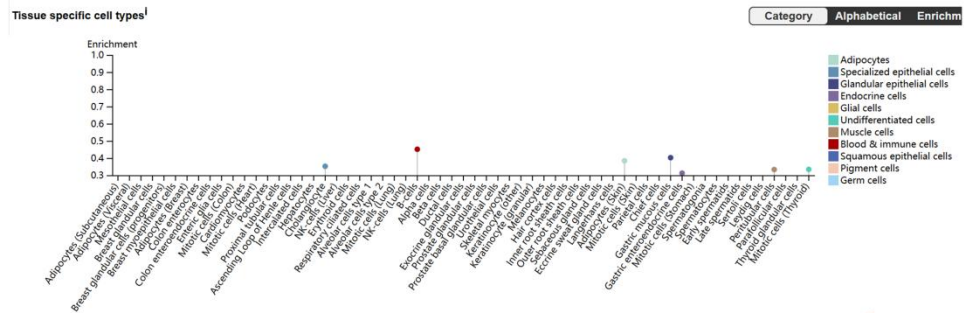

Supplement: 41598_2023_33915_MOESM1_ESM.pdf [file 41598_2023_33915_MOESM1_ESM.pdf]
